# Supplementary figures and images for: Pioneer longitudinal axons navigate using floor plate and Slit/Robo signals
Source: Oxford University Press journal article supplement (doi:10.1242/dev.023325), 2008-10-08

MLF cell bodies

Commissural cell bodies

fp

Slit1<sup>-/-</sup>; Slit2<sup>+/-</sup> control

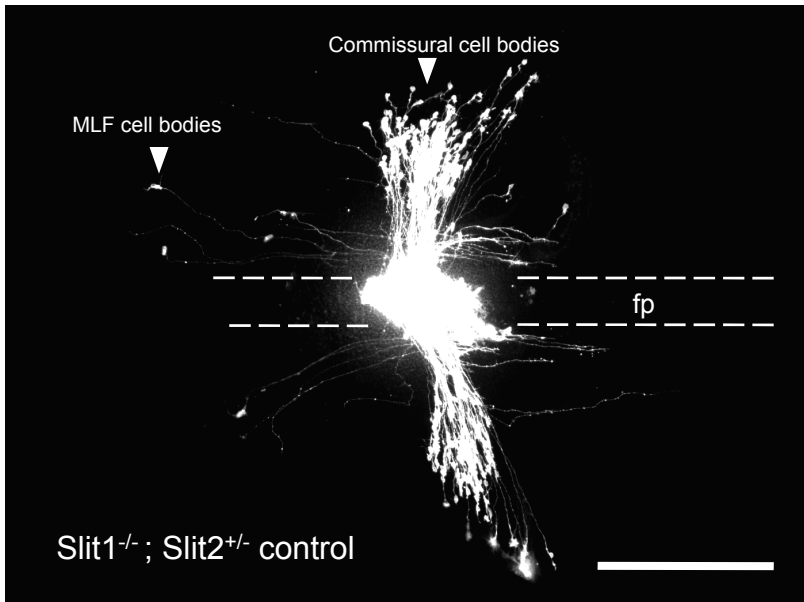

Supplement: dev023325-sup-023325-figs3.pdf [file dev023325-sup-023325-figs3.pdf]
